# Supplementary material for: Correlation between 146S Antigen Content in Foot-and-Mouth Disease Inactivated Vaccines and Immunogenicity Level and Vaccine Potency Alternative Test Methods
Source: MDPI journal article supplement (doi:10.3390/vetsci11040168), 2024-04-08

Supplementary Table S1 Raw data of 146S/dose and PD<sub>50</sub>

| 146S (μg/dose) | PD <sub>50</sub> | 146S (μg/dose ) | PD <sub>50</sub> | 146S (μg/dose ) | PD <sub>50</sub> |
|----------------|------------------|-----------------|------------------|-----------------|------------------|
| 4.724          | 7.05             | 5.884           | 7.49             | 10.136          | 10.81            |
| 6.066          | 7.05             | 5.578           | 7.49             | 15.612          | 10.81            |
| 5.048          | 7.05             | 6.746           | 9                | 15.614          | 11.84            |
| 6.036          | 7.19             | 7.416           | 9                | 14.904          | 11.84            |
| 5.646          | 7.19             | 6.746           | 9                | 15.426          | 13.59            |
| 5.198          | 7.19             | 6.708           | 10.32            | 10.802          | 13.59            |
| 4.068          | 7.49             | 7.546           | 10.32            | 11.812          | 13.59            |
| 5.574          | 7.49             | 10.022          | 10.32            | 12.718          | 13.59            |
| 16.4           | 13.59            | 16.546          | 15.59            | 18.542          | 15.59            |
| 15.392         | 13.59            | 17.688          | 15.59            | 19.052          | 15.59            |
| 13.14          | 13.59            | 17.732          | 15.59            | 21.6            | 15.59            |
| 14.944         | 13.59            | 18.554          | 15.59            | 22.186          | 15.59            |
| 15.806         | 13.39            | 19.074          | 15.59            | 38.898          | 15.59            |
| 16.736         | 13.59            | 20.188          | 15.59            | 29.058          | 15.59            |
| 15.806         | 13.59            | 18.704          | 15.59            | 15.632          | 13.59            |
| 18.426         | 15.59            | /               | /                | /               | /                |

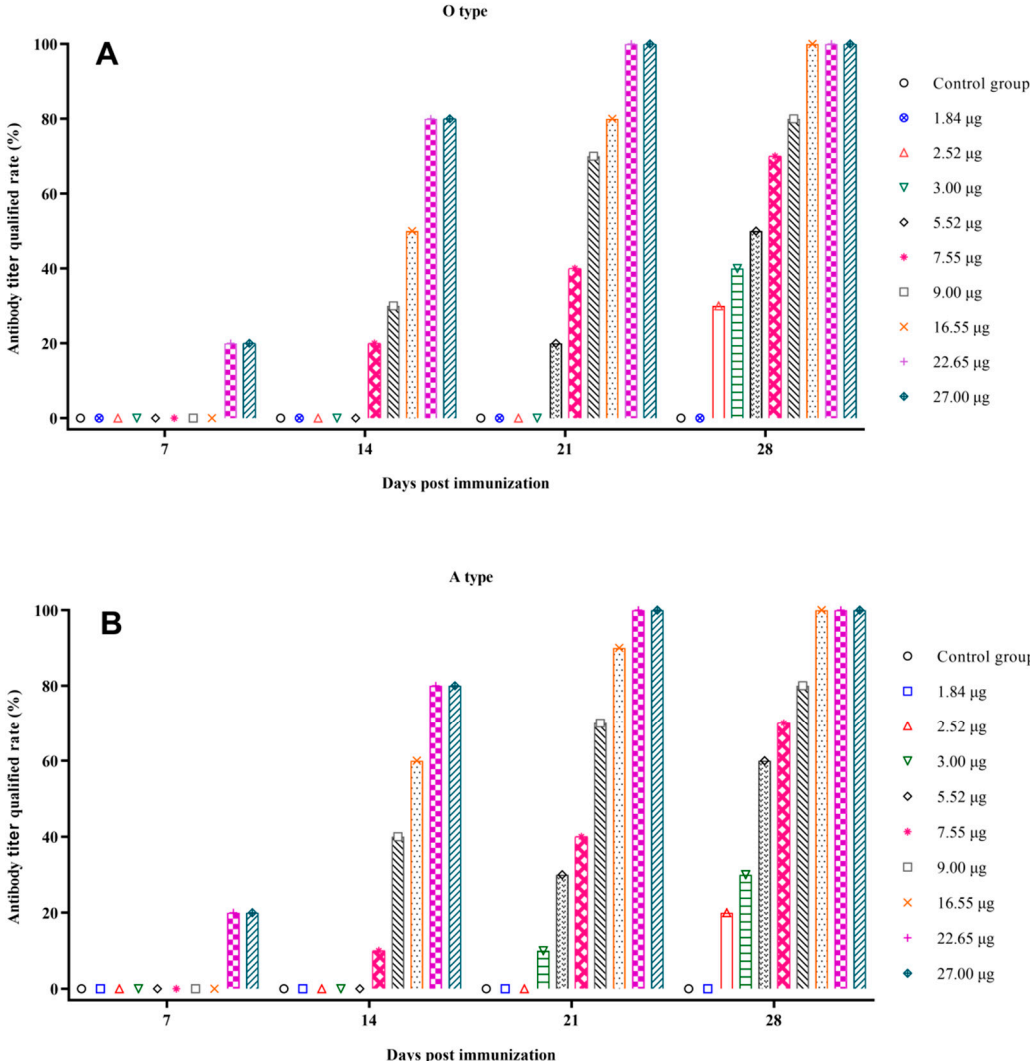

Supplement: s1 [file s1]
